# Supplementary material for: Cottonseed Meal Protein Isolate as a New Source of Alternative Proteins: A Proteomics Perspective
Source: Int J Mol Sci. 2022 Sep 3;23(17):10105. doi: 10.3390/ijms231710105 (PMC9455987; doi:10.3390/ijms231710105)
Supplement: Supplementary file 1 [file ijms-23-10105-s001.zip › Table S1_ In-silico analysis of allergenic features against AllergenOnline Database.xlsx]

## Sheet: G3M3I6
Hit	Defline	Species	Best	# Hits	Full Alignment			Links		Six identical contiguous aa
#			%ID	> 35%	E-val	%ID	length	NCBI	Details
1	gi|307159112|gid|1572|prunin 1 precursor [Prunus dulcis]	Prunus dulcis	0.679	339of408	1.3e-44	0.463	547	gi|307159112	GO!	Yes
2	gi|258588247|gid|1572|Chain A, Crystal Structure Of Pru D	Prunus dulcis	0.679	334of408	5.6e-44	0.459	547	gi|258588247	GO!	Yes
3	gi|25991543|gid|76|allergen Ana 0 2 [Anacardium occidenta	Anacardium occidentale	0.662	318of408	1.4e-38	0.488	484	gi|25991543	GO!	Yes
4	gi|307159114|gid|1572|prunin 2 precursor, partial [Prunus	Prunus dulcis	0.65	332of408	4.9e-49	0.453	512	gi|307159114	GO!	Yes
5	gi|56788031|gid|817|seed storage protein [Juglans regia]	Juglans regia	0.642	359of408	1e-36	0.508	506	gi|56788031	GO!	Yes
6	gi|18479082|gid|392|11S globulin-like protein [Corylus av	Corylus avellana	0.6379	360of408	2.6e-57	0.492	498	gi|18479082	GO!	Yes
7	gi|1126299828|gid|2597|legumin [Juglans nigra]	Juglans nigra	0.6379	355of408	1e-55	0.5	510	gi|1126299828	GO!	Yes
8	gi|158998782|gid|2066|11S legumin protein [Carya illinoin	Carya illinoinensis	0.637	364of408	4.5e-36	0.507	503	gi|158998782	GO!	Yes
9	gi|158998780|gid|2066|11S legumin protein [Carya illinoin	Carya illinoinensis	0.637	364of408	5.1e-36	0.505	503	gi|158998780	GO!	Yes
10	gi|13183173|gid|2274|11S globulin [Sesamum indicum]	Sesamum indicum	0.637	319of408	3.8e-30	0.476	475	gi|13183173	GO!	Yes
11	gi|82469930|gid|2650|11S globulin-like protein [Actinidia	Actinidia chinensis	0.634	321of408	6.8e-31	0.462	485	gi|82469930	GO!	Yes
12	gi|523916668|gid|1572|putative Pru du 6 allergen, partial	Prunus dulcis	0.6251	123of408	2.2e-14	0.538	169	gi|523916668	GO!	Yes
13	gi|557792009|gid|392|Cor a 9 allergen [Corylus avellana]	Corylus avellana	0.6122	359of408	5e-39	0.483	491	gi|557792009	GO!	Yes
14	gi|29839254|gid|531|13S globulin seed storage protein 1 p	Fagopyrum esculentum	0.6004	294of408	1.1e-34	0.377	551	gi|29839254	GO!	Yes
15	gi|113200131|gid|531|allergenic protein [Fagopyrum tatari	Fagopyrum tataricum	0.6	295of408	1.5e-33	0.426	488	gi|113200131	GO!	Yes
16	gi|30313867|gid|347|11S globulin [Bertholletia excelsa]	Bertholletia excelsa	0.6	303of408	4.5e-27	0.437	490	gi|30313867	GO!	Yes
17	gi|110349083|gid|1093|Pis v 2.0101 allergen11S globulin p	Pistacia vera	0.6	346of408	8.4e-41	0.457	486	gi|110349083	GO!	Yes
18	gi|1534918238|gid|347|Chain A, 11S globulin	Bertholletia excelsa	0.6	303of408	5.2e-26	0.436	473	gi|1534918238	GO!	Yes
19	gi|29839419|gid|531|13S globulin seed storage protein 3 p	Fagopyrum esculentum	0.5876	291of408	2.8e-34	0.397	521	gi|29839419	GO!	Yes
20	gi|156001070|gid|1093|11S globulin [Pistacia vera]	Pistacia vera	0.576	330of408	1.6e-29	0.453	492	gi|156001070	GO!	Yes
21	gi|110349085|gid|1093|Pis v 2.0201 allergen 11S globulin	Pistacia vera	0.576	344of408	2e-29	0.455	492	gi|110349085	GO!	Yes
22	gi|18639|gid|733|glycinin subunit G3 [Glycine max]	Glycine max	0.563	298of408	1.8e-30	0.413	492	gi|18639	GO!	Yes
23	gi|112380623|gid|291|iso-Ara h3 [Arachis hypogaea]	Arachis hypogaea	0.5626	301of408	3.6e-38	0.401	516	gi|112380623	GO!	Yes
24	gi|312233065|gid|291|Ara h 3 allergen [Arachis hypogaea]	Arachis hypogaea	0.5626	301of408	5.1e-38	0.401	516	gi|312233065	GO!	Yes
25	gi|169969|gid|574|glycinin	Glycine max	0.556	273of408	4.2e-25	0.376	519	gi|169969	GO!	Yes
26	gi|10566449|gid|574|glycinin A3B4 subunit [Glycine max]	Glycine max	0.556	276of408	1.5e-22	0.383	519	gi|10566449	GO!	Yes
27	gi|21314465|gid|291|allergen Arah3/Arah4 [Arachis hypogae	Arachis hypogaea	0.554	327of408	1.1e-25	0.427	527	gi|21314465	GO!	Yes
28	gi|224036293|gid|291|Chain A, Crystal Structure Of Peanut	Arachis hypogaea	0.55	353of408	1.1e-27	0.422	516	gi|224036293	GO!	Yes
29	gi|62240392|gid|837|11S globulin precursor [Sinapis alba]	Sinapis alba	0.55	297of408	1.2e-47	0.389	524	gi|62240392	GO!	Yes
30	gi|199732457|gid|291|arachin Arah3 isoform [Arachis hypog	Arachis hypogaea	0.55	350of408	1.2e-27	0.422	516	gi|199732457	GO!	Yes
31	gi|5712199|gid|291|glycinin [Arachis hypogaea]	Arachis hypogaea	0.55	357of408	3.1e-25	0.417	521	gi|5712199	GO!	Yes
32	gi|169971|gid|574|glycinin precursor	Glycine max	0.543	134of408	1e-22	0.407	204	gi|169971	GO!	Yes
33	gi|218265|gid|732|glycinin A2B1a subunit [Glycine max]	Glycine max	0.538	276of408	2.2e-24	0.405	494	gi|218265	GO!	Yes
34	gi|169973|gid|572|glycinin A-1a-B-x subunit [Glycine max]	Glycine max	0.538	299of408	6.4e-24	0.409	506	gi|169973	GO!	Yes
35	gi|18609|gid|732|Glycinin A2B1a subunit-like [Glycine max	Glycine max	0.538	276of408	2.2e-24	0.405	494	gi|18609	GO!	Yes
36	gi|18615|gid|572|Glycinin-like [Glycine max]	Glycine max	0.538	299of408	1.8e-23	0.405	506	gi|18615	GO!	Yes
37	gi|3703107|gid|291|glycinin [Arachis hypogaea]	Arachis hypogaea	0.5372	328of408	1.3e-26	0.414	510	gi|3703107	GO!	Yes
38	gi|18641|gid|573|glycinin [Glycine max]	Glycine max	0.525	285of408	2.4e-22	0.354	562	gi|18641	GO!	Yes
39	gi|806556|gid|573|A5A4B3 subunit [Glycine soja]	Glycine soja	0.525	285of408	2.7e-22	0.357	561	gi|806556	GO!	Yes
40	gi|732706|gid|573|Glycinin-like protein product [Glycine	Glycine max	0.525	288of408	6.1e-23	0.35	534	gi|732706	GO!	Yes
41	gi|4249568|gid|573|glycinin [Glycine max]	Glycine max	0.525	285of408	2.4e-22	0.357	561	gi|4249568	GO!	Yes
42	gi|5381325|gid|2273|11S globulin precursor [Sesamum indic	Sesamum indicum	0.5125	310of408	3.6e-25	0.391	489	gi|5381325	GO!	Yes

## Sheet: G3M3J0
Hit	Defline	Species	Best	# Hits	Full Alignment			Links		Six identical contiguous aa
#			%ID	> 35%	E-val	%ID	length	NCBI	Details
1	gi|156001070|gid|1093|11S globulin [Pistacia vera]	Pistacia vera	0.762	326of415	1.4e-52	0.552	502	gi|156001070	GO!	Yes
2	gi|110349085|gid|1093|Pis v 2.0201 allergen 11S globulin	Pistacia vera	0.762	342of415	1.4e-52	0.554	502	gi|110349085	GO!	Yes
3	gi|110349083|gid|1093|Pis v 2.0101 allergen11S globulin p	Pistacia vera	0.738	400of415	8.7e-52	0.567	497	gi|110349083	GO!	Yes
4	gi|258588247|gid|1572|Chain A, Crystal Structure Of Pru D	Prunus dulcis	0.662	349of415	4.1e-48	0.448	538	gi|258588247	GO!	Yes
5	gi|307159112|gid|1572|prunin 1 precursor [Prunus dulcis]	Prunus dulcis	0.662	365of415	1.5e-47	0.45	538	gi|307159112	GO!	Yes
6	gi|18479082|gid|392|11S globulin-like protein [Corylus av	Corylus avellana	0.65	394of415	3.5e-73	0.497	479	gi|18479082	GO!	Yes
7	gi|113200131|gid|531|allergenic protein [Fagopyrum tatari	Fagopyrum tataricum	0.65	357of415	2.2e-47	0.471	499	gi|113200131	GO!	Yes
8	gi|557792009|gid|392|Cor a 9 allergen [Corylus avellana]	Corylus avellana	0.65	389of415	1.5e-74	0.503	477	gi|557792009	GO!	Yes
9	gi|29839254|gid|531|13S globulin seed storage protein 1 p	Fagopyrum esculentum	0.637	299of415	2.9e-45	0.404	562	gi|29839254	GO!	Yes
10	gi|307159114|gid|1572|prunin 2 precursor, partial [Prunus	Prunus dulcis	0.63	376of415	8.4e-74	0.464	483	gi|307159114	GO!	Yes
11	gi|29839419|gid|531|13S globulin seed storage protein 3 p	Fagopyrum esculentum	0.625	333of415	8.2e-45	0.429	532	gi|29839419	GO!	Yes
12	gi|13183173|gid|2274|11S globulin [Sesamum indicum]	Sesamum indicum	0.622	373of415	1.2e-42	0.474	487	gi|13183173	GO!	Yes
13	gi|29839255|gid|531|13S globulin seed storage protein 2 p	Fagopyrum esculentum	0.613	322of415	1.1e-43	0.439	501	gi|29839255	GO!	Yes
14	gi|158998782|gid|2066|11S legumin protein [Carya illinoin	Carya illinoinensis	0.6	402of415	4.8e-87	0.496	474	gi|158998782	GO!	Yes
15	gi|158998780|gid|2066|11S legumin protein [Carya illinoin	Carya illinoinensis	0.6	402of415	5.6e-87	0.492	474	gi|158998780	GO!	Yes
16	gi|25991543|gid|76|allergen Ana 0 2 [Anacardium occidenta	Anacardium occidentale	0.598	351of415	4.7e-41	0.475	469	gi|25991543	GO!	Yes
17	gi|56788031|gid|817|seed storage protein [Juglans regia]	Juglans regia	0.58	414of415	1.5e-88	0.485	474	gi|56788031	GO!	Yes
18	gi|1534918238|gid|347|Chain A, 11S globulin	Bertholletia excelsa	0.5752	355of415	7.4e-40	0.46	472	gi|1534918238	GO!	Yes
19	gi|30313867|gid|347|11S globulin [Bertholletia excelsa]	Bertholletia excelsa	0.5752	355of415	2e-40	0.461	473	gi|30313867	GO!	Yes
20	gi|584592120|gid|2481|13S globulin [Fagopyrum esculentum]	Fagopyrum esculentum	0.5752	286of415	1.7e-30	0.397	474	gi|584592120	GO!	Yes
21	gi|1126299828|gid|2597|legumin [Juglans nigra]	Juglans nigra	0.575	414of415	1.9e-87	0.483	478	gi|1126299828	GO!	Yes
22	gi|584592116|gid|2481|13S globulin [Fagopyrum esculentum]	Fagopyrum esculentum	0.563	284of415	1.7e-30	0.395	474	gi|584592116	GO!	Yes
23	gi|10566449|gid|574|glycinin A3B4 subunit [Glycine max]	Glycine max	0.549	291of415	8.1e-35	0.385	496	gi|10566449	GO!	Yes
24	gi|18641|gid|573|glycinin [Glycine max]	Glycine max	0.543	257of415	9.8e-36	0.357	518	gi|18641	GO!	Yes
25	gi|806556|gid|573|A5A4B3 subunit [Glycine soja]	Glycine soja	0.543	276of415	1.3e-35	0.366	519	gi|806556	GO!	Yes
26	gi|732706|gid|573|Glycinin-like protein product [Glycine	Glycine max	0.543	252of415	1.8e-35	0.365	518	gi|732706	GO!	Yes
27	gi|4249568|gid|573|glycinin [Glycine max]	Glycine max	0.543	276of415	9.8e-36	0.361	518	gi|4249568	GO!	Yes
28	gi|523916668|gid|1572|putative Pru du 6 allergen, partial	Prunus dulcis	0.5254	120of415	8.4e-16	0.467	169	gi|523916668	GO!	Yes
29	gi|18639|gid|733|glycinin subunit G3 [Glycine max]	Glycine max	0.525	300of415	2.8e-31	0.392	475	gi|18639	GO!	Yes
30	gi|169969|gid|574|glycinin	Glycine max	0.524	286of415	7.9e-40	0.385	496	gi|169969	GO!	Yes
31	gi|18609|gid|732|Glycinin A2B1a subunit-like [Glycine max	Glycine max	0.5125	303of415	5.1e-36	0.395	461	gi|18609	GO!	Yes
32	gi|218265|gid|732|glycinin A2B1a subunit [Glycine max]	Glycine max	0.5125	303of415	5.1e-36	0.395	461	gi|218265	GO!	Yes
33	gi|5381325|gid|2273|11S globulin precursor [Sesamum indic	Sesamum indicum	0.5	288of415	5.6e-36	0.384	487	gi|5381325	GO!	Yes
34	gi|169973|gid|572|glycinin A-1a-B-x subunit [Glycine max]	Glycine max	0.5	296of415	3.6e-77	0.397	471	gi|169973	GO!	Yes
35	gi|112380623|gid|291|iso-Ara h3 [Arachis hypogaea]	Arachis hypogaea	0.487	293of415	1.1e-55	0.393	488	gi|112380623	GO!	Yes
36	gi|18615|gid|572|Glycinin-like [Glycine max]	Glycine max	0.487	298of415	1.8e-75	0.393	471	gi|18615	GO!	Yes
37	gi|312233065|gid|291|Ara h 3 allergen [Arachis hypogaea]	Arachis hypogaea	0.487	293of415	2.4e-55	0.393	488	gi|312233065	GO!	Yes

## Sheet: G3M3J4
Hit	Defline	Species	Best	# Hits	Full Alignment			Links		Six identical contiguous aa
#			%ID	> 35%	E-val	%ID	length	NCBI	Details
1	gi|157384600|gid|991|7S vicilin [Carya illinoinensis]	Carya illinoinensis	0.6004	458of458	3e-42	0.45	565	gi|157384600	GO!	Yes
2	gi|1052244924|gid|991|Chain F, Crystal Structure Of Pecan	Carya illinoinensis	0.6004	362of458	6.6e-33	0.481	420	gi|1052244924	GO!	Yes
3	gi|6580762|gid|613|vicilin-like protein precursor [Juglan	Juglans regia	0.587	458of458	8.8e-37	0.45	562	gi|6580762	GO!	Yes
4	gi|1098817075|gid|2851|PREDICTED: sucrose-binding protein	Juglans regia	0.575	371of458	5.7e-27	0.441	481	gi|1098817075	GO!	Yes
5	gi|31321944|gid|613|vicilin seed storage protein [Juglans	Juglans nigra	0.575	419of458	5.3e-33	0.467	482	gi|31321944	GO!	Yes
6	gi|19338630|gid|16|48-kDa glycoprotein precursor [Corylus	Corylus avellana	0.563	335of458	7.9e-25	0.42	476	gi|19338630	GO!	Yes
7	gi|1757285428|gid|2876|vicilin [Prunus dulcis]	Prunus dulcis	0.543	396of458	1.6e-19	0.413	526	gi|1757285428	GO!	Yes
8	gi|13183177|gid|206|7S globulin [Sesamum indicum]	Sesamum indicum	0.5125	329of458	3.8e-30	0.385	564	gi|13183177	GO!	Yes
9	gi|312233063|gid|287|Ara h 1 allergen [Arachis hypogaea]	Arachis hypogaea	0.512	192of458	3.3e-10	0.332	573	gi|312233063	GO!	Yes
10	gi|21666498|gid|75|vicilin-like protein [Anacardium occid	Anacardium occidentale	0.5002	282of458	4.1e-25	0.361	540	gi|21666498	GO!	Yes
11	gi|21914823|gid|75|vicilin-like protein [Anacardium occid	Anacardium occidentale	0.5002	288of458	3.8e-25	0.363	540	gi|21914823	GO!	Yes
12	gi|133711974|gid|1269|vicilin [Pistacia vera]	Pistacia vera	0.5002	338of458	3.7e-26	0.374	553	gi|133711974	GO!	Yes
13	gi|347447588|gid|287|Chain A, Crystal Structure Of Ara H	Arachis hypogaea	0.5	266of458	1.1e-11	0.386	425	gi|347447588	GO!	Yes
14	gi|375332427|gid|287|Chain A, Crystal Structure Of Major	Arachis hypogaea	0.5	266of458	1.1e-11	0.386	425	gi|375332427	GO!	Yes
15	gi|1168391|gid|287|Allergen Ara h 1, clone P41B precursor	Arachis hypogaea	0.5	284of458	2.1e-13	0.346	573	gi|1168391	GO!	Yes
16	gi|1168390|gid|287|Allergen Ara h 1, clone P17 precursor	Arachis hypogaea	0.5	304of458	7.2e-13	0.359	551	gi|1168390	GO!	Yes
17	gi|9967357|gid|2083|alpha subunit of beta conglycinin, pa	Glycine max	0.47	235of458	1.7e-22	0.34	547	gi|9967357	GO!	Yes
18	gi|18536|gid|2083|Beta-conglycinin, alpha subunit-like [G	Glycine max	0.47	228of458	2e-22	0.338	547	gi|18536	GO!	Yes
19	gi|9967361|gid|2084|alpha' subunit of beta-conglycinin, p	Glycine max	0.463	269of458	5.1e-23	0.34	538	gi|9967361	GO!	Yes
20	gi|15425631|gid|2084|beta-conglycinin alpha prime subunit	Glycine max	0.463	269of458	1.2e-22	0.341	577	gi|15425631	GO!	Yes
21	gi|169929|gid|2084|beta-conglycinin storage protein [Glyc	Glycine max	0.458	281of458	6.5e-16	0.33	557	gi|169929	GO!	Yes

## Sheet: A0A1U8LLA0
Hit	Defline	Species	Best	# Hits	Full Alignment			Links		Six identical contiguous aa
#			%ID	> 35%	E-val	%ID	length	NCBI	Details
1	gi|157384600|gid|991|7S vicilin [Carya illinoinensis]	Carya illinoinensis	0.6	463of509	6.9e-23	0.429	588	gi|157384600	GO!	Yes
2	gi|1052244924|gid|991|Chain F, Crystal Structure Of Pecan	Carya illinoinensis	0.6	358of509	2.8e-18	0.47	415	gi|1052244924	GO!	Yes
3	gi|6580762|gid|613|vicilin-like protein precursor [Juglan	Juglans regia	0.587	483of509	5.6e-23	0.436	589	gi|6580762	GO!	Yes
4	gi|31321944|gid|613|vicilin seed storage protein [Juglans	Juglans nigra	0.575	417of509	1.7e-21	0.461	477	gi|31321944	GO!	Yes
5	gi|1757285428|gid|2876|vicilin [Prunus dulcis]	Prunus dulcis	0.538	399of509	1.4e-10	0.4	533	gi|1757285428	GO!	Yes
6	gi|19338630|gid|16|48-kDa glycoprotein precursor [Corylus	Corylus avellana	0.525	333of509	3.7e-14	0.41	471	gi|19338630	GO!	Yes
7	gi|1098817075|gid|2851|PREDICTED: sucrose-binding protein	Juglans regia	0.525	362of509	1.4e-16	0.415	477	gi|1098817075	GO!	Yes
8	gi|13183177|gid|206|7S globulin [Sesamum indicum]	Sesamum indicum	0.5	341of509	5e-16	0.364	605	gi|13183177	GO!	Yes
9	gi|21914823|gid|75|vicilin-like protein [Anacardium occid	Anacardium occidentale	0.4875	170of509	1.6e-13	0.322	538	gi|21914823	GO!	Yes
10	gi|21666498|gid|75|vicilin-like protein [Anacardium occid	Anacardium occidentale	0.4875	163of509	1.6e-13	0.32	538	gi|21666498	GO!	Yes
11	gi|9967361|gid|2084|alpha' subunit of beta-conglycinin, p	Glycine max	0.475	336of509	3.3e-16	0.355	561	gi|9967361	GO!	Yes
12	gi|15425631|gid|2084|beta-conglycinin alpha prime subunit	Glycine max	0.475	336of509	4.5e-16	0.343	616	gi|15425631	GO!	Yes
13	gi|18536|gid|2083|Beta-conglycinin, alpha subunit-like [G	Glycine max	0.463	296of509	3.7e-16	0.341	601	gi|18536	GO!	Yes
14	gi|9967357|gid|2083|alpha subunit of beta conglycinin, pa	Glycine max	0.463	301of509	5e-16	0.359	560	gi|9967357	GO!	Yes

## Sheet: A0A1U8PKJ6
Hit	Defline	Species	Best	# Hits	Full Alignment			Links		Six identical contiguous aa*	*No Allergen Found
#			%ID	> 35%	E-val	%ID	length	NCBI	Details
1	gi|31321942|gid|614|2S albumin seed storage protein [Jugl	Juglans nigra	0.388	29of59	3e-08	0.349	146	gi|31321942	GO!	No
2	gi|28207731|gid|411|putative allergen I1 [Carya illinoine	Carya illinoinensis	0.375	26of59	1.7e-07	0.338	145	gi|28207731	GO!	No
3	gi|1794252|gid|614|albumin seed storage protein precursor	Juglans regia	0.362	9of59	2.6e-07	0.352	142	gi|1794252	GO!	No
