# Supplementary material for: Cottonseed Meal Protein Isolate as a New Source of Alternative Proteins: A Proteomics Perspective
Source: Int J Mol Sci. 2022 Sep 3;23(17):10105. doi: 10.3390/ijms231710105 (PMC9455987; doi:10.3390/ijms231710105)
Supplement: Supplementary file 1 [file ijms-23-10105-s001.zip › Table S2_In-silico analysis of allergenic features using AllerCatPro2.0.xlsx]

## Sheet: Table S2_In-silico analysis of 
Protein	Sequence Length	Gluten allergens (# of Q-repeats)	# of 3x6-mer overlaps	Best known allergen hit name	Species	Number of known allergen hits	Best hit UniProt/NCBI	Best hit SUPFAM	Best hit Pfam	Best hit InterPro	Best hit IgE prevalence	Best hit Allergen info	% identity linear 80 aa window	% identity 3D epitope	Result	Comment	% identity to closest human hit	% identity to closest low-allergen hit
tr|G3M3I6|G3M3I6_GOSHI Seed storage protein legumin A (Fragment) OS=Gossypium hirsutum OX=3635 GN=le	487	0	-	Jug n 4	Juglans nigra	91	A0A1L6K371	RmlC-like cupins (SSF51182)	PF00190	-	-	-	66.2	81.2	weak evidence	3Depi <=93%	-	-
tr|G3M3J0|G3M3J0_GOSHI Seed storage protein legumin B (Fragment) OS=Gossypium hirsutum OX=3635 GN=le	494	4	-	Pis v 2	Pistacia vera	101	B7P074	-	-	-	-	-	76.2	94.1	strong evidence	Gluten-like Q-repeats and 3Depi >93%	-	-
tr|G3M3J4|G3M3J4_GOSHI Seed storage protein vicilin A (Fragment) OS=Gossypium hirsutum OX=3635 GN=vi	537	2	-	Gos h Vicilin	Gossypium hirsutum	94	P09801	RmlC-like cupins (SSF51182)	PF00190 PF04702	IPR006045 IPR014710 IPR011051 IPR006792	-	AG(1)	91.2	100	strong evidence	Gluten-like Q-repeats and 3Depi >93%	-	-
tr|A0A1U8LLA0|A0A1U8LLA0_GOSHI vicilin C72 OS=Gossypium hirsutum OX=3635 GN=LOC107928551 PE=3 SV=1	588	6	-	Gos h Vicilin	Gossypium hirsutum	116	P09801	RmlC-like cupins (SSF51182)	PF00190 PF04702	IPR006045 IPR014710 IPR011051 IPR006792	-	AG(1)	100	100	strong evidence	Gluten-like Q-repeats and 3Depi >93%	-	-
tr|A0A1U8PKJ6|A0A1U8PKJ6_GOSHI 2S sulfur-rich seed storage protein 2-like OS=Gossypium hirsutum OX=3	138	0	-	Car i 1	Carya illinoinensis	20	Q84XA9	Bifunctional inhibitor/lipid-transfer protein/seed storage 2S albumin (SSF47699)	PF00234	IPR016140 IPR036312 IPR000617	28	AG(2), food/insect allergen, anaphylaxis (High)	38.8	35.7	weak evidence	3Depi <=93%	-	-
